# Supplementary material for: Highly efficient removal of TiO2nanoparticles from aquatic bodies by silica microsphere impregnated Ca-alginate
Source: Royal Society of Chemistry journal article supplement (doi:10.1039/c5nj02428e), 2016-01-01
Supplement: c5nj02428e1.pdf [file c5nj02428e1.pdf]

**Electronic Supplementary Information (ESI)  
for New Journal of Chemistry, The Royal Society of Chemistry**

**Highly efficient removal of TiO<sub>2</sub> nanoparticles from aquatic bodies by silica  
microspheres impregnated Ca-alginate**

**Hirakendu Basu, Mehzabin Vivek Pimple, Rakesh Kumar Singhal**

Analytical Chemistry Division

Bhabha Atomic Research Centre, Trombay, Mumbai -400085, India

E mail: [rsinghal@barc.gov.in](mailto:rsinghal@barc.gov.in) ;Tel:91-22-25592233 fax No 91-22-25505151

**Evidence of the stability of the bead:**

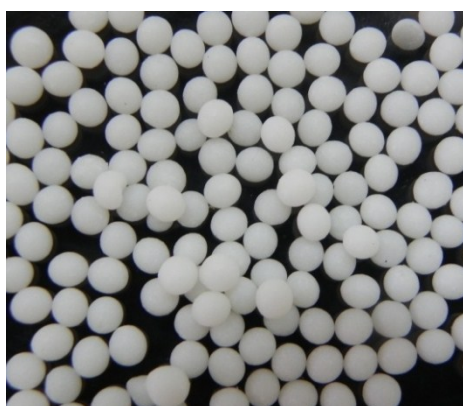

Fig: 6 months old Cal-Alg-SM beads

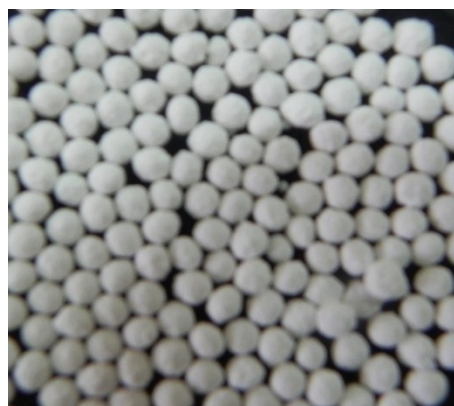

Fig: Dried and 6 months old Cal-Alg-SM beads

**Sherrer analysis for the size determination of TiO<sub>2</sub> NP:**

$$D_p = \frac{0.94 * \lambda}{FWHM * \cos\theta}$$

Where,  $D_p$  = Average crystallite size,  $\lambda = 1.54 \text{ \AA}$ ,  $\theta$  = Bragg angle

From the most intense peak at the XRD of TiO<sub>2</sub> NP, the required parameters (FWHM,  $\theta$ ) were obtained and  $D_p$  was calculated as follows:

| $2\theta$ | FWHM  | Size (nm) |
|-----------|-------|-----------|
| 25.5946   | 0.293 | 29.04     |

### **The effect of dose:**

The effect of dose of sorbent was studied under the fixed concentration of  $\text{TiO}_2\text{NP}$  ( $100 \mu\text{g mL}^{-1}$ ), pH 4-5 keeping the contact time at 8h. The result is given below. It shows that the percentage uptake initially increases up to dose rate of  $5 \text{ mg g}^{-1}$  thereafter becomes almost constant. So dose rate of  $5 \text{ mg g}^{-1}$  is used for most of the experiments.

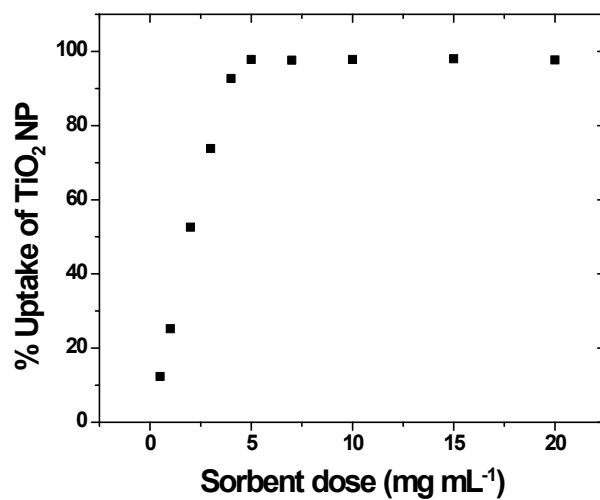

**Pore size distribution:**

The following figures show the pore size distribution of silica microspheres (SM) and Cal-Alg-SM beads derived from BET isotherm (Instrument model: Surfer; Thermo Scientific).

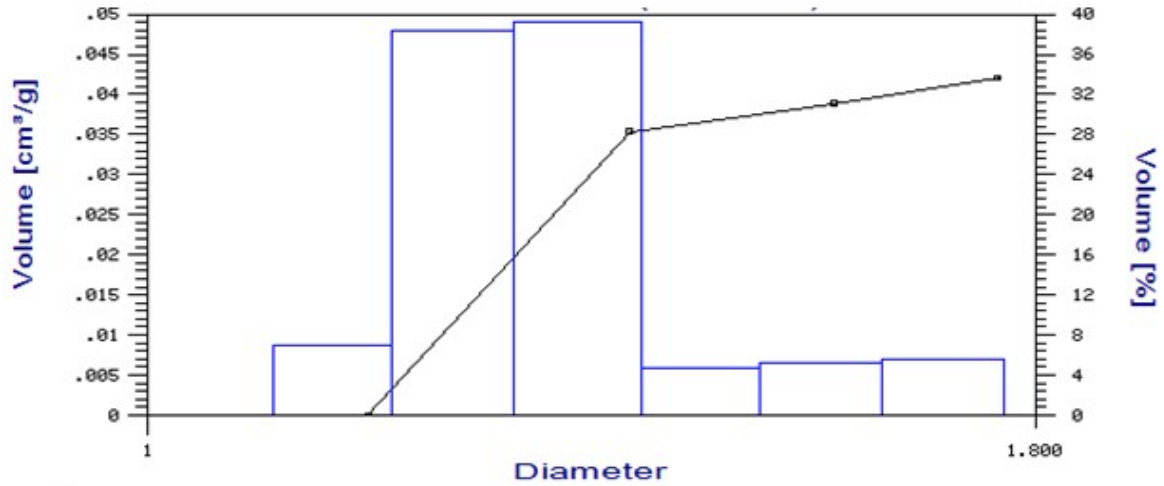

Fig: Pore size distribution of silica microsphere

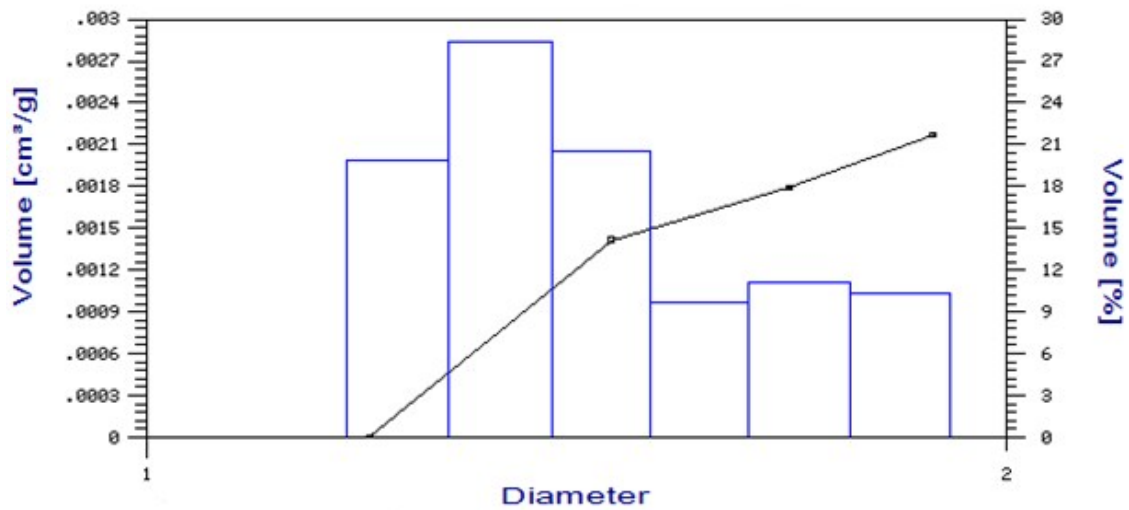

Fig: Pore size distribution of Cal-Alg-SM beads
